# Supplementary material for: The DLO Hi-C Tool for Digestion-Ligation-Only Hi-C Chromosome Conformation Capture Data Analysis
Source: MDPI journal article supplement (doi:10.3390/genes11030289), 2020-03-10
Supplement: s1 [file s1]

Table S1. The cosine similarity and PCC between DLO Hi-C Tool and published data

|              | Cosine similarity |             | Pearson<br>coefficient | correlation |
|--------------|-------------------|-------------|------------------------|-------------|
|              | K562-MseI-1       | K562-MseI-2 | K562-MseI-1            | K562-MseI-2 |
| whole genome | 0.99995           | 0.99996     | 0.99996                | 0.99996     |
| chr1         | 0.99985           | 0.99985     | 0.99985                | 0.99985     |
| chr2         | 0.99986           | 0.99987     | 0.99986                | 0.99987     |
| chr3         | 0.99980           | 0.99980     | 0.99980                | 0.99980     |
| chr4         | 0.99979           | 0.99980     | 0.99979                | 0.99980     |
| chr5         | 0.99985           | 0.99986     | 0.99985                | 0.99986     |
| chr6         | 0.99981           | 0.99981     | 0.99980                | 0.99981     |
| chr7         | 0.99986           | 0.99987     | 0.99986                | 0.99987     |
| chr8         | 0.99982           | 0.99983     | 0.99982                | 0.99983     |
| chr9         | 0.99980           | 0.99979     | 0.99980                | 0.99979     |
| chr10        | 0.99982           | 0.99983     | 0.99982                | 0.99983     |
| chr11        | 0.99984           | 0.99985     | 0.99984                | 0.99985     |
| chr12        | 0.99986           | 0.99986     | 0.99986                | 0.99986     |
| chr13        | 0.99983           | 0.99984     | 0.99983                | 0.99984     |
| chr14        | 0.99983           | 0.99984     | 0.99983                | 0.99985     |
| chr15        | 0.99986           | 0.99985     | 0.99985                | 0.99986     |
| chr16        | 0.99980           | 0.99980     | 0.99980                | 0.99980     |
| chr17        | 0.99985           | 0.99985     | 0.99985                | 0.99985     |
| chr18        | 0.99985           | 0.99985     | 0.99985                | 0.99985     |
| chr19        | 0.99976           | 0.99977     | 0.99976                | 0.99977     |
| chr20        | 0.99982           | 0.99983     | 0.99982                | 0.99982     |
| chr21        | 0.99987           | 0.99987     | 0.99987                | 0.99987     |
| chr22        | 0.99969           | 0.99964     | 0.99969                | 0.99964     |
| chrX         | 0.99986           | 0.99986     | 0.99986                | 0.99986     |
