# Supplementary material for: The DLO Hi-C Tool for Digestion-Ligation-Only Hi-C Chromosome Conformation Capture Data Analysis
Source: Genes (Basel). 2020 Mar 10;11(3):289. doi: 10.3390/genes11030289 (PMC7140825; doi:10.3390/genes11030289)
Supplement: Supplementary file 1 [file genes-11-00289-s001.zip]

Archive with 4 entries (4 files):
- Supplemantary 1.pdf
- Supplementary 2.html
- Supplementary 3.pdf
- Supplementary 4.pdf
